# Supplementary material for: Establishment of a novel human CIC-DUX4 sarcoma cell line, Kitra-SRS, with autocrine IGF-1R activation and metastatic potential to the lungs
Source: PubMed Central journal article supplement (PMC6825133; doi:10.1038/s41598-019-52143-3), 2019-11-01
Supplement: 41598_2019_52143_MOESM1_ESM.pdf [file 41598_2019_52143_MOESM1_ESM.pdf]

## Supplementary Information

### Establishment of a novel human CIC-DUX4 sarcoma cell line, Kitra-SRS, with autocrine IGF-1R activation and metastatic potential to the lungs

Sho Nakai<sup>1</sup>, Shutaro Yamada<sup>2</sup>, Hidetatsu Outani<sup>1</sup>, Takaaki Nakai<sup>3</sup>, Naohiro Yasuda<sup>1</sup>, Hirokazu Mae<sup>1</sup>, Yoshinori Imura<sup>4</sup>, Toru Wakamatsu<sup>4</sup>, Hironari Tamiya<sup>4</sup>, Takaaki Tanaka<sup>4</sup>, Kenichiro Hamada<sup>1</sup>, Akiyoshi Tani<sup>5</sup>, Akira Myoui<sup>1</sup>, Nobuhito Araki<sup>6</sup>, Takafumi Ueda<sup>7</sup>, Hideki Yoshikawa<sup>1</sup>, Satoshi Takenaka<sup>1\*</sup>, Norifumi Naka<sup>1,4</sup>

<sup>1</sup> Department of Orthopaedic Surgery, Osaka University Graduate School of Medicine, 2-2 Yamadaoka, Suita, Osaka 565-0871, Japan

<sup>2</sup> Department of Orthopaedic Surgery, Yao Municipal Hospital, 1-3-1 Ryugecho, Yao, Osaka 581-0069, Japan

<sup>3</sup> Department of Orthopaedic Surgery, Kawachi General Hospital, 1-31 Yokomakura, Higashiosaka, Osaka 578-0954, Japan

<sup>4</sup> Musculoskeletal Oncology Service, Osaka International Cancer Institute, 3-1-69 Otemae, Chuo-ku, Osaka 541-8567, Japan

<sup>5</sup> Compound Library Screening Center, Osaka University Graduate School of Pharmaceutical Sciences, 1-6 Yamadaoka, Suita, Osaka 565-0871, Japan

<sup>6</sup> Department of Orthopaedic Surgery, Ashiya Municipal Hospital, 39-1 Asahigaokacho, Ashiya, Hyogo 659-8502, Japan

<sup>7</sup> Department of Orthopaedic Surgery, Osaka National Hospital, 2-1-14 Hoenzaka, Chuo-ku, Osaka 540-0006, Japan

\*Corresponding author: Satoshi Takenaka

Department of Orthopaedic Surgery, Osaka University Graduate School of Medicine

2-2 Yamadaoka, Suita, Osaka 565-0871, Japan, Phone: +81-6-6879-3552; Fax: +81-6-6879-3559

E-mail: s.takenaka.0816@ort.med.osaka-u.ac.jp

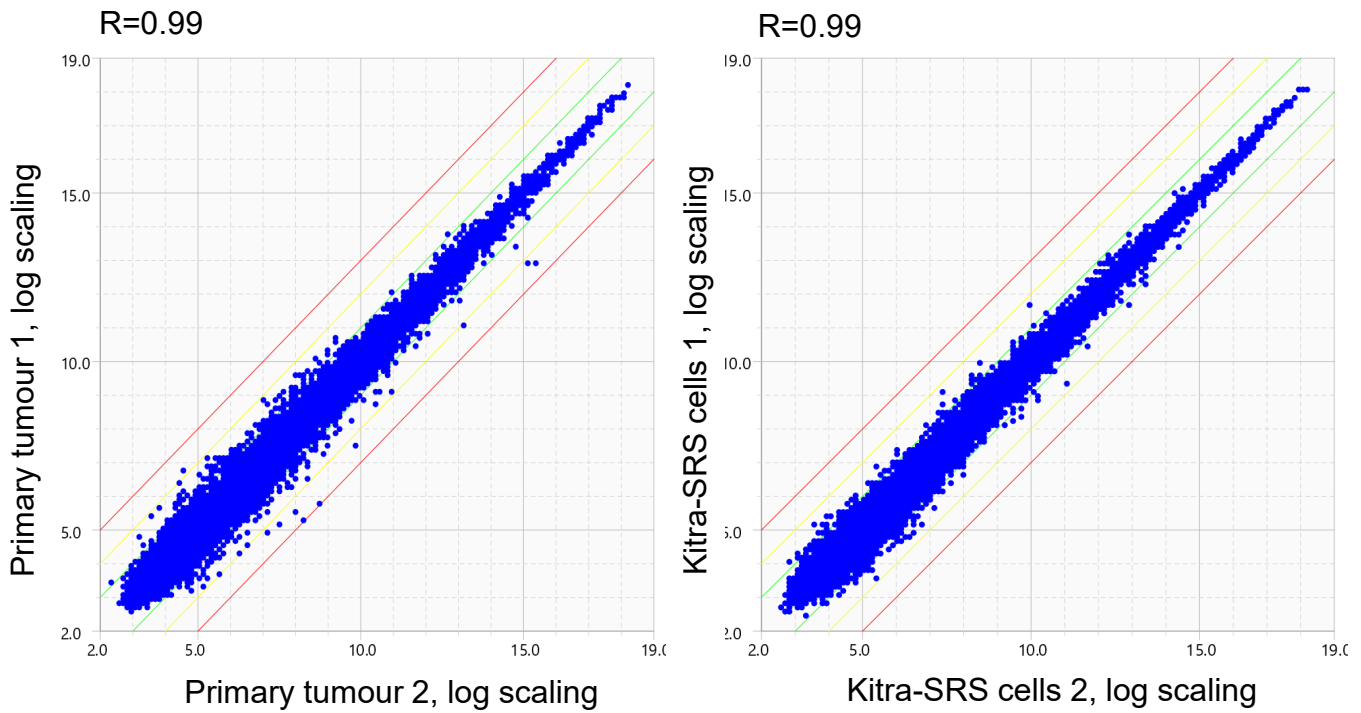

**Supplementary Figure S1.** Scatter plots showing the correlation of gene expression between samples of the primary tumour (left) and the correlation between samples of Kitra-SRS cells (right). R represents the correlation coefficient. Green and red lines indicate absolute log-fold-change  $>1$  and  $>3$ , respectively.

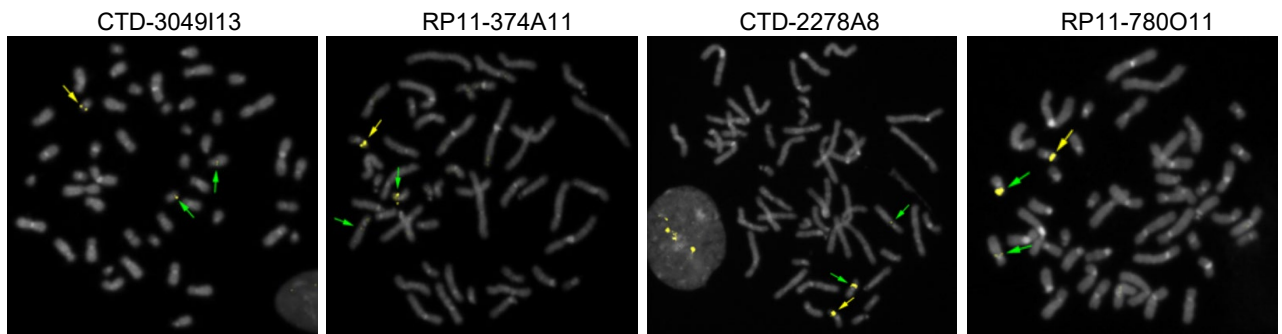

**Supplementary Figure S2.** FISH analysis of Kitra-SRS cells. The yellow arrows indicate probes for the 19q13.2 region; the green arrows, a split of one copy of each probe.

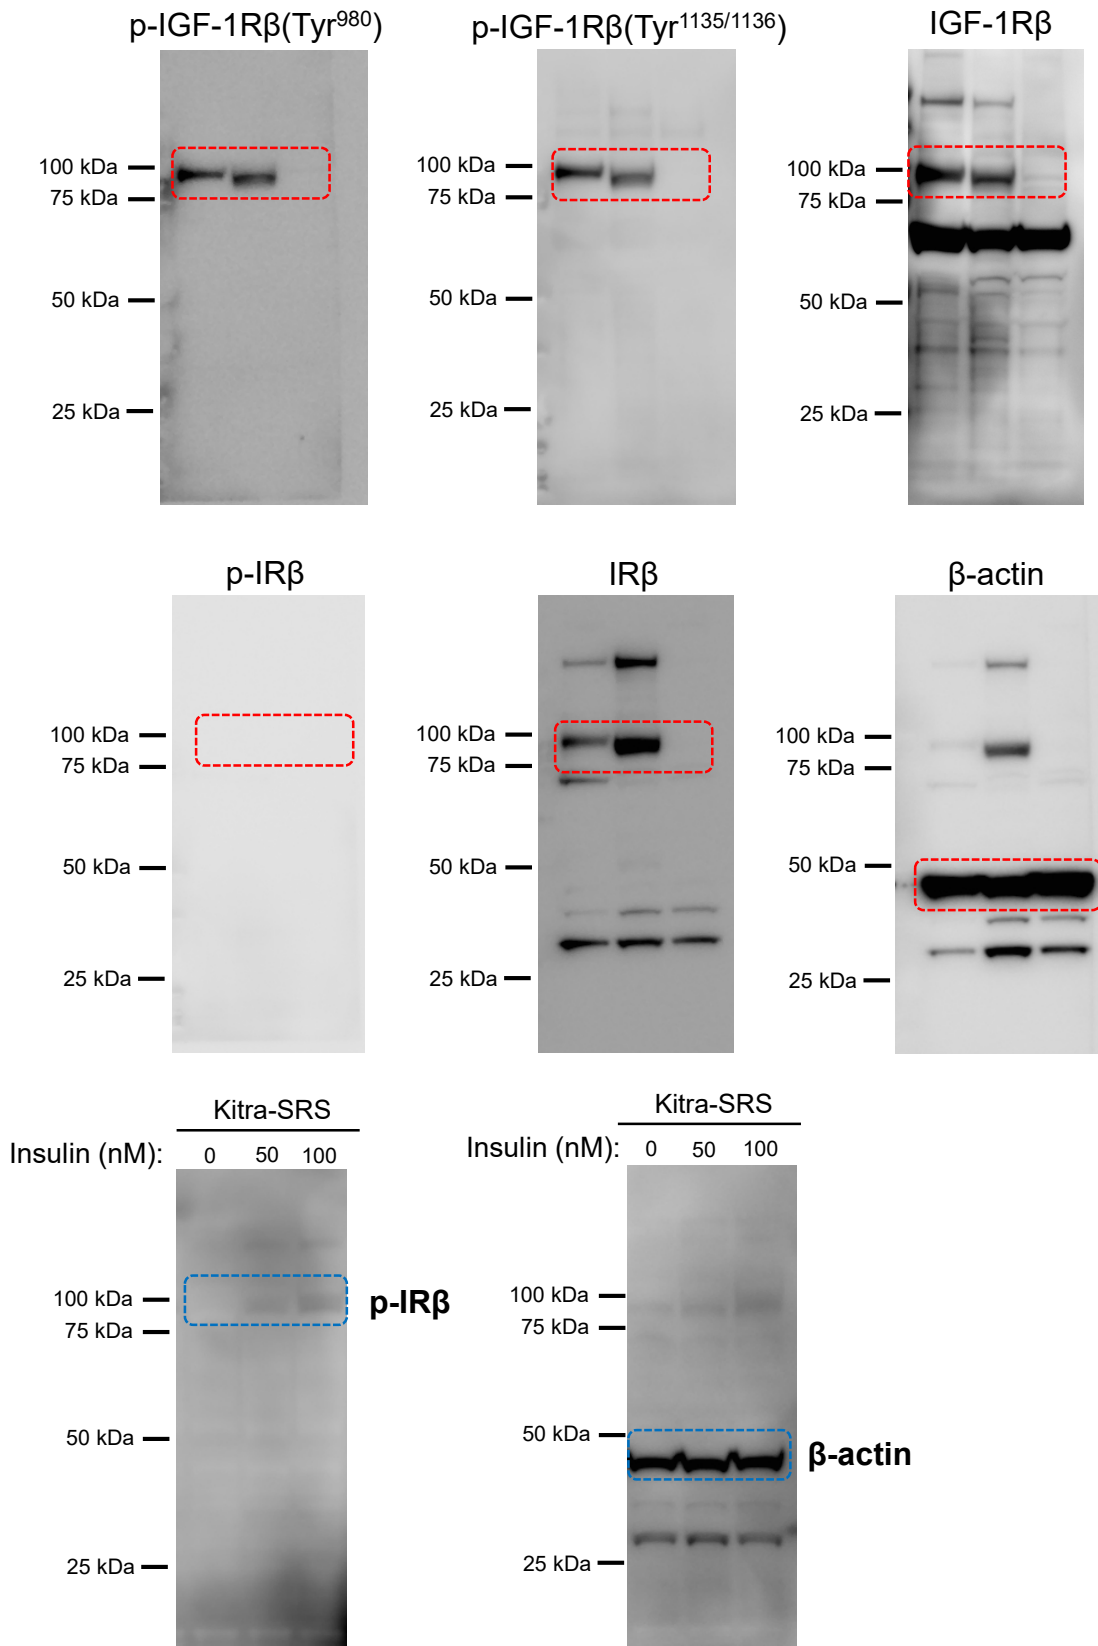

**Supplementary Figure S3.** Full-length blots of p-IGF-1Rβ(Tyr<sup>980</sup>), p-IGF-1Rβ(Tyr<sup>1135/1136</sup>), IGF-1Rβ, p-IRβ, IRβ and β-actin protein expression for Figure 5b. Kitra-SRS cells were treated with 0-100 nM insulin for 10 min and then subjected to western blotting with the anti-p-IRβ antibody. Insulin was used as a positive control.

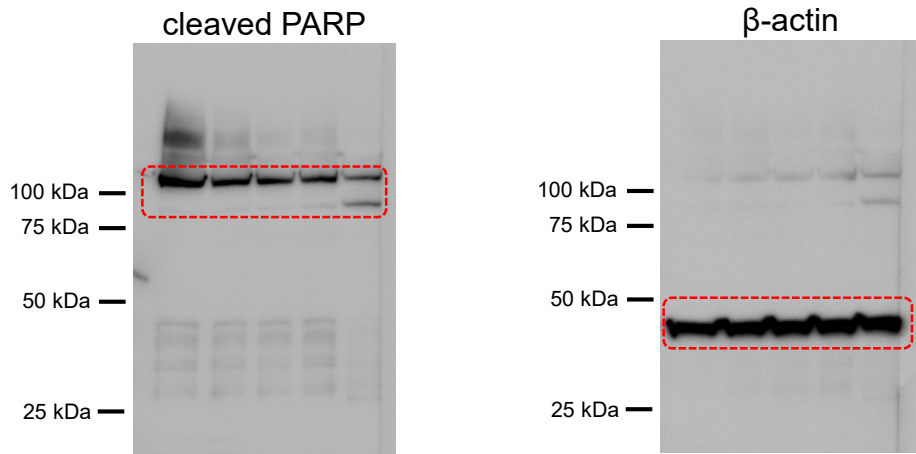

**Supplementary Figure S4.** Full-length blots of cleaved PARP and  $\beta$ -actin protein expression for Figure 6c.

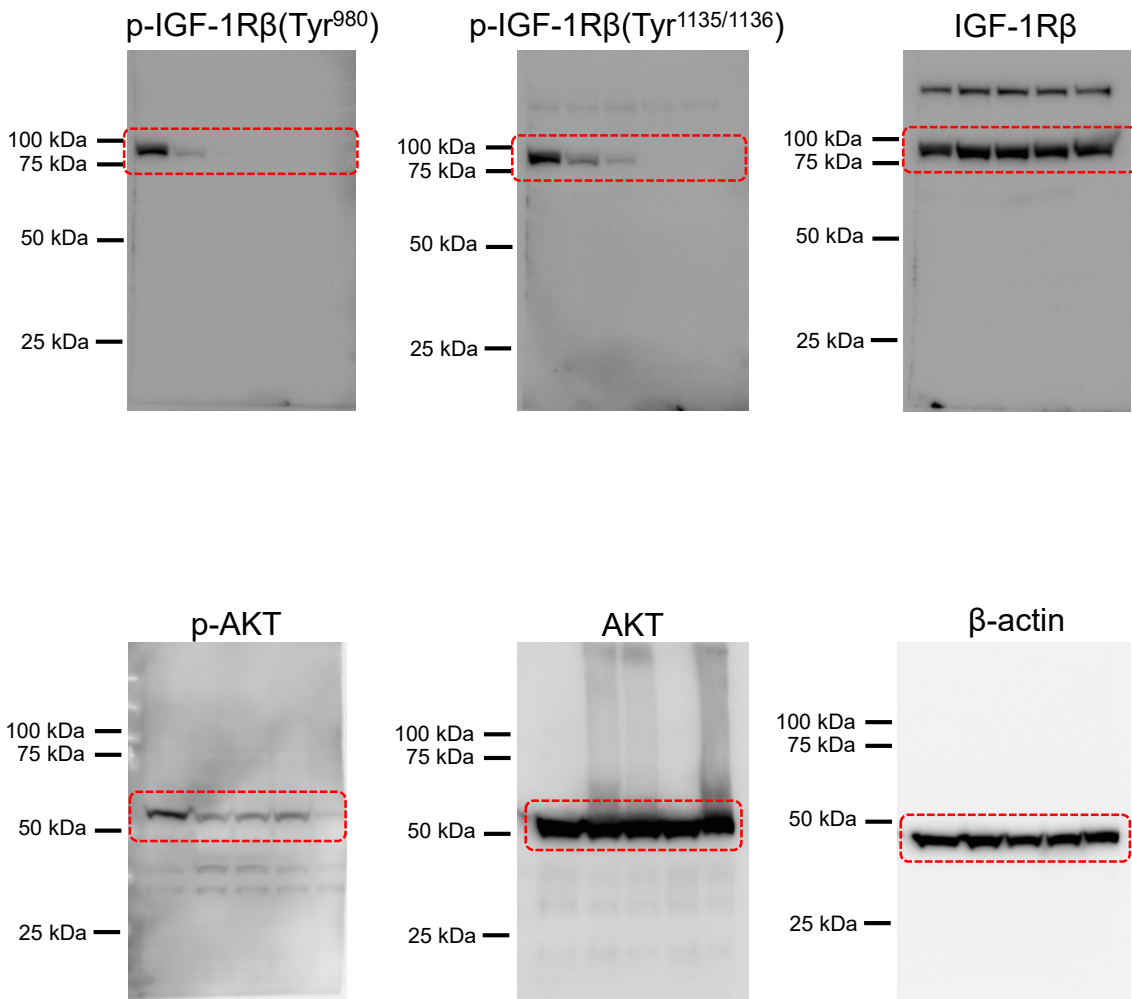

**Supplementary Figure S5.** Full-length blots of p-IGF-1Rβ(Tyr<sup>980</sup>), p-IGF-1Rβ(Tyr<sup>1135/1136</sup>), IGF-1Rβ, p-AKT, AKT and β-actin protein expression for Figure 6d.

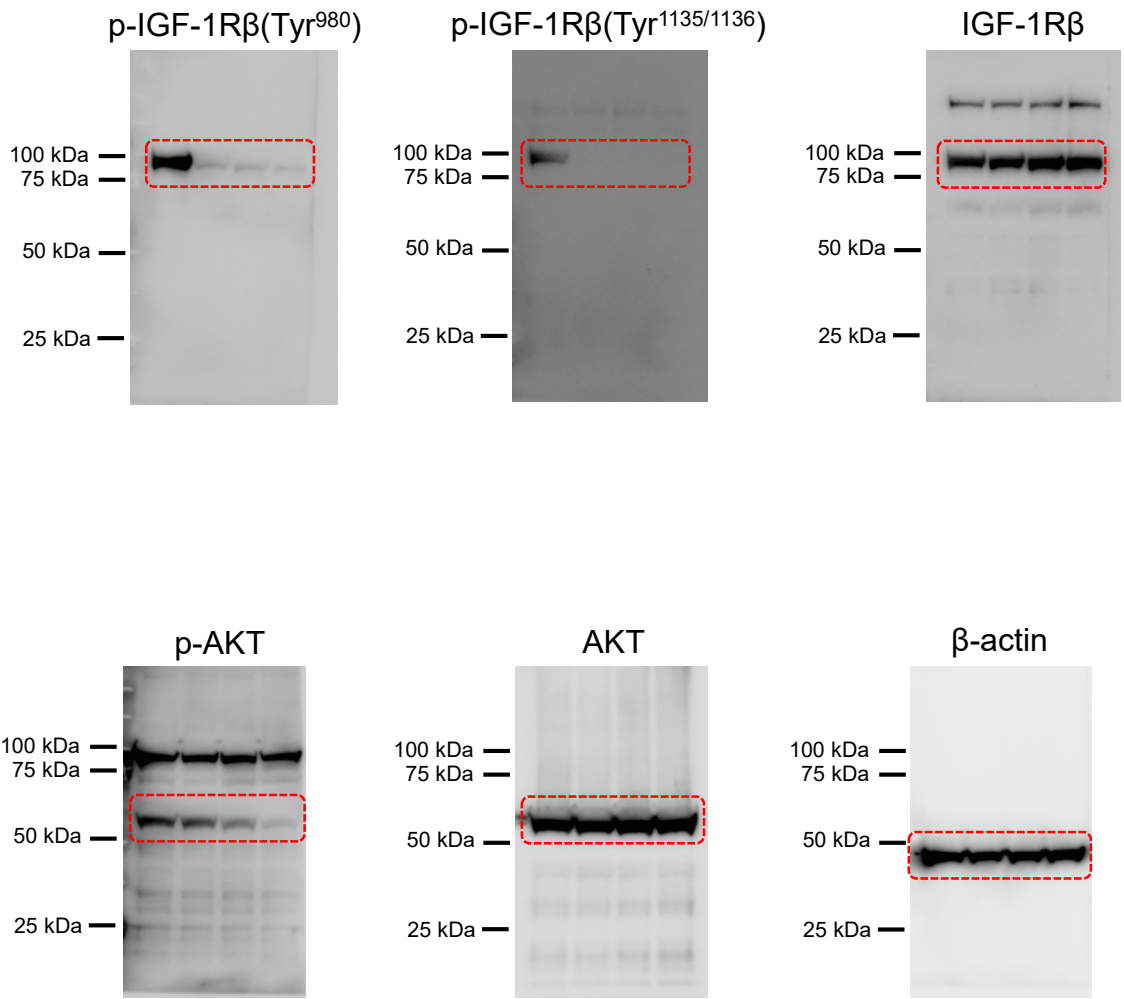

**Supplementary Figure S6.** Full-length blots of p-IGF-1Rβ(Tyr<sup>980</sup>), p-IGF-1Rβ(Tyr<sup>1135/1136</sup>), IGF-1Rβ, p-AKT, AKT and β-actin protein expression for Figure 6e.

Vehicle mouse 1

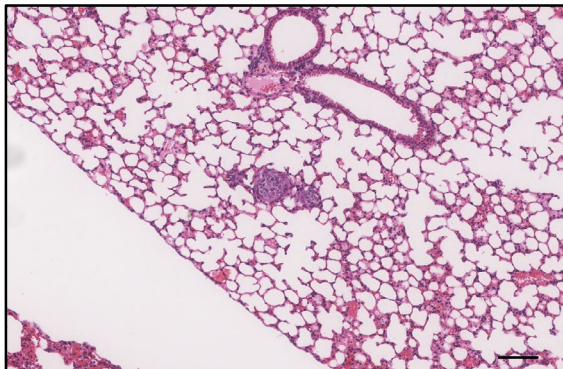

Vehicle mouse 2

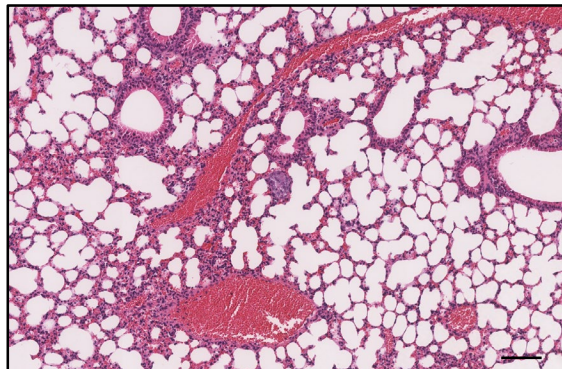

Vehicle mouse 3

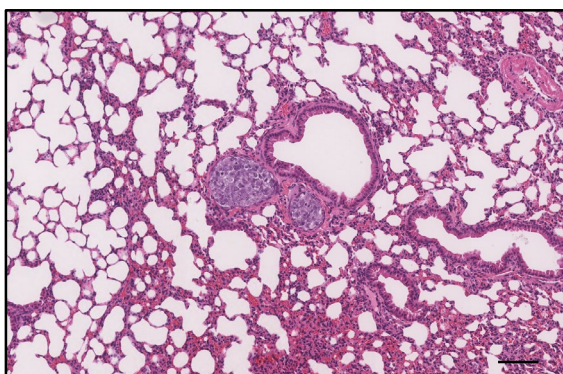

Vehicle mouse 4

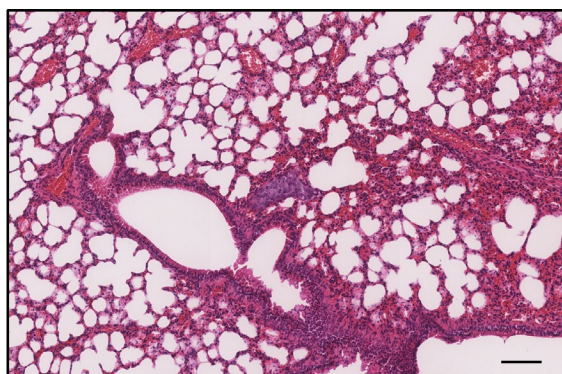

Vehicle mouse 5

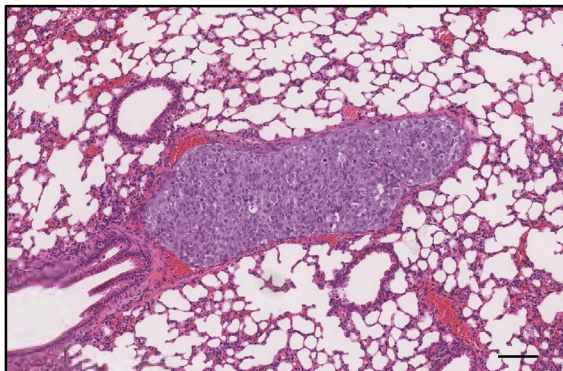

**Supplementary figure S7.** HE staining of lungs in vehicle-treated mice. Scale bars: 100 $\mu$ m.



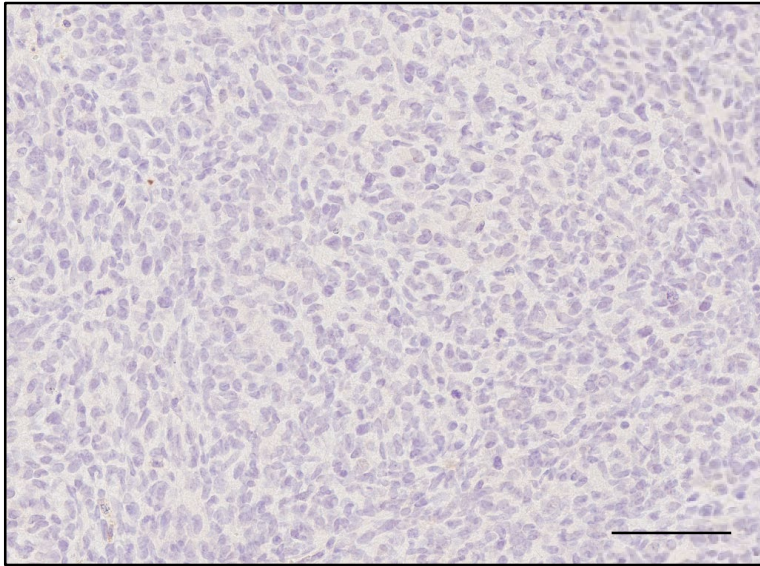

**Supplementary Figure S8.** A negative control for Ki-67 immunostaining.

p-IGF-1R $\beta$ (Tyr<sup>980</sup>)

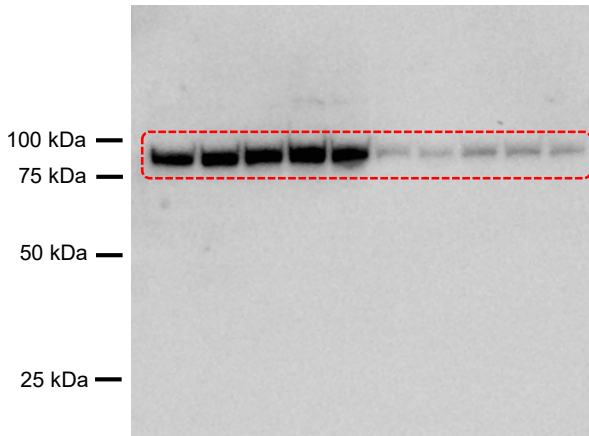

p-IGF-1R $\beta$ (Tyr<sup>1135/1136</sup>)

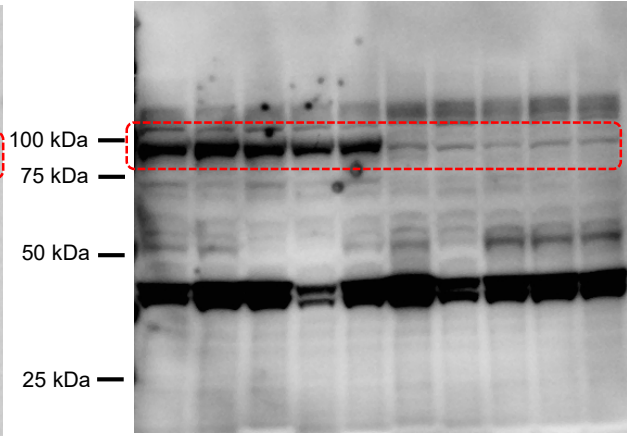

IGF-1R $\beta$

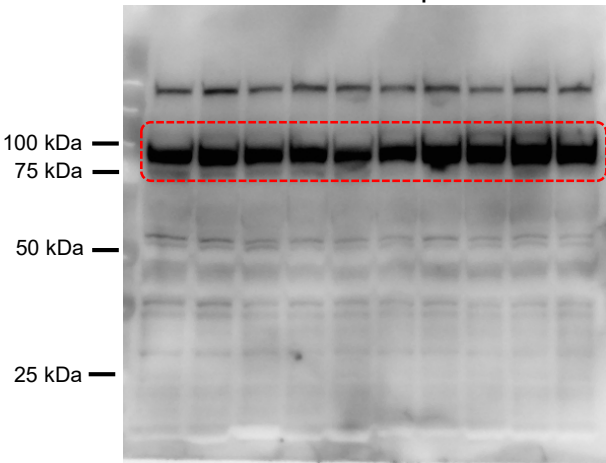

p-AKT

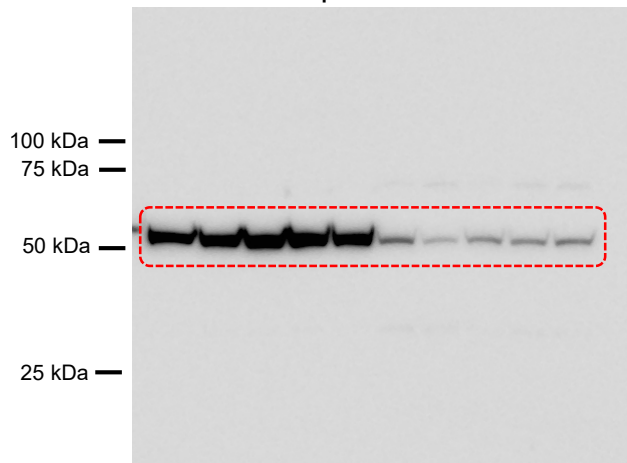

AKT

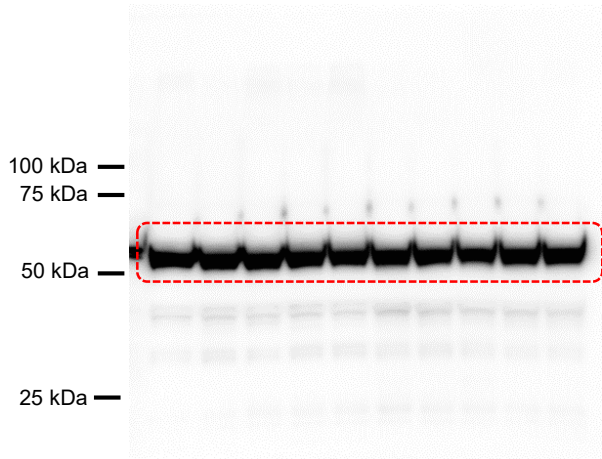

$\beta$ -actin

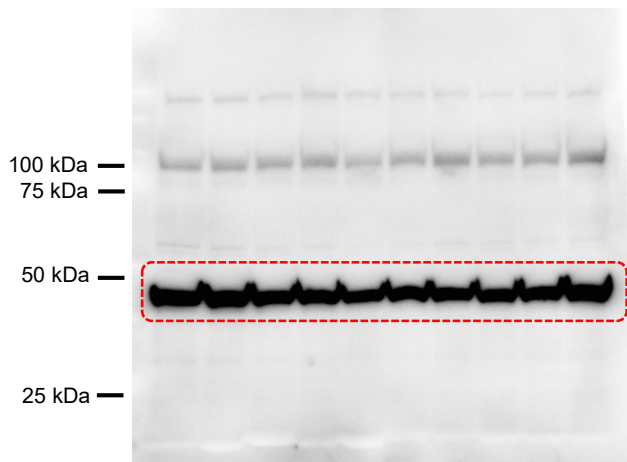

**Supplementary Figure S9.** Full-length blots of p-IGF-1R $\beta$ (Tyr<sup>980</sup>), p-IGF-1R $\beta$ (Tyr<sup>1135/1136</sup>), IGF-1R $\beta$ , p-AKT, AKT and  $\beta$ -actin protein expression for Figure 7g.

**Supplementary Table S1.** STR analysis.

| Microsatellite<br>(Chromosome) | Kitra-SRS (P50) | Tumor Tissue |
|--------------------------------|-----------------|--------------|
| Amelogenin                     | X, X            | X, X         |
| D21S11                         | 29, 32.2        | 29, 32.2     |
| D5S818                         | 10, 12          | 10, 12       |
| D13S317                        | 8, 10           | 8, 10        |
| D7S820                         | 11, 12          | 11, 12       |
| D16S539                        | 9               | 9            |
| vWA                            | 16, 18          | 16, 18       |
| TH01                           | 7, 9            | 7, 9         |
| TPOX                           | 8, 9            | 8, 9         |
| CSF1PO                         | 12              | 12           |

Cells were compared to a tumor tissue from the patient.

P indicates a passage number of a cell line.

**Supplementary Table S2.** Detection of *CIC-DUX4* from RNA-seq data.

|           |                               |
|-----------|-------------------------------|
|           | <i>CIC(4525)-DUX4L2(1075)</i> |
| Kitra-SRS | <i>CIC(4376)-DUX4L4(1014)</i> |
|           | <i>CIC(4505)-DUX4L12(977)</i> |

Numbers in parentheses represent the nucleotide position at the breakpoint junction in the reference cDNA sequence of each gene; *CIC* (NM\_015125), *DUX4L2* (NM\_001127386), *DUX4L4* (NM\_001177376), and *DUX4L12* (NG\_012776).

**Supplementary Table S3.** Primer sequences for the RT-PCR.

| <b>Primer name</b>  | <b>Primer sequence (5'→3')</b> |
|---------------------|--------------------------------|
| <b>CIC4120(ref)</b> | TGAGTTGCCTGAGTTTCG             |
| <b>DUX4RTr2</b>     | TGAGGGGTGCTTCCAGCG             |
| <b>CIC-fl</b>       | ACCATGTATTTCGGCCCCACAGG        |
| <b>DUX4-fl</b>      | TCCTAAAGCTCCTCCAGCAGAG         |
| <b>pENTER1A-F</b>   | CTACAAACTCTTCCTGTTAGTTAG       |
| <b>pENTER1A-R</b>   | ATGGCTCATAACACCCCTTG           |
| <b>CIC770F</b>      | AAGGAGAAGCAGAAGTACCACGAC       |
| <b>CIC1522F</b>     | GTTTTCACCTGTGATCCGTTCTC        |
| <b>CIC2309F</b>     | CCTGCCACTGTCACTAACCTACTG       |
| <b>CIC3046F</b>     | CAGAATCACCTATGTGCAGTCAGC       |
| <b>CIC3838F</b>     | CAGCAAATTCCCCAGCTCATCTTC       |
| <b>CIC4523F</b>     | GCCCGCTATGCAGACATCTTTC         |

**Supplementary Table S4.** *DUX4* pseudogenes identical to the *DUX4* component of *CIC-DUX4* transcript of Kitra-SRS cells from Ensemble Genome Browser 95: <http://www.ensembl.org/index.html>.

| Subject name      | Gene           | Genomic Location       |
|-------------------|----------------|------------------------|
| ENST00000611059.1 | <i>DUX4L15</i> | 10:133760834-133761125 |
| ENST00000554103.2 | <i>DUX4L13</i> | 10:133754225-133754516 |
| ENST00000622460.1 | <i>DUX4L10</i> | 10:133744307-133744598 |
| ENST00000619712.1 | <i>DUX4L20</i> | 10:133684645-133684936 |
| ENST00000622058.1 | <i>DUX4L21</i> | 10:133681346-133681637 |
| ENST00000618238.1 | <i>DUX4L22</i> | 10:133678036-133678327 |
| ENST00000615195.1 | <i>DUX4L23</i> | 10:133674726-133675017 |
| ENST00000617576.2 | <i>DUX4L24</i> | 10:133671427-133671718 |
| ENST00000624915.1 | <i>DUX4L25</i> | 10:133668128-133668419 |
| ENST00000566884.2 | <i>DUX4L4</i>  | 4:190082095-190082386  |

**Supplementary Table S5.** Karyotype results of 10 metaphase cells on Kitra-SRS cells at passage 20 in M-FISH analysis.

| Karyotype results                                    | Cell number |
|------------------------------------------------------|-------------|
| 48, XX, del(1)(p32), +8, t(12;19)(q13;q13), +20      | 6           |
| 48, XX, +8, t(12;19)(q13;q13), +20                   | 2           |
| 47, XX, del(1)(p32), +8, t(12;19)(q13;q13), -15, +20 | 1           |
| 47, XX, del(1)(p32), t(12;19)(q13;q13), +20          | 1           |

**Supplementary Table S6.** Karyotype results of 20 metaphase cells on Kitra-SRS cells at passage 100 in G-banding.

| Karyotype results                                                                                  | Cell number |
|----------------------------------------------------------------------------------------------------|-------------|
| 47,XX,del(1)(p?),+8,der(12)add(12)(p13)t(12;19)(q13;q13.1),<br>der(19)t(12;19)(q13;q13.1)          | 15          |
| 49,XX,+1,del(1)(p?)x2,+8,t(12;19)(q13;q13.1),+20                                                   | 1           |
| 48,XX,del(1)(p?),+8,t(12;19)(q13;q13.1),+20                                                        | 1           |
| 48,XX,del(1)(p?),+8,+der(12)t(12;19)(q13;q13.1),<br>t(12;19)(q13;q13.1),+20                        | 1           |
| 48,XX,del(1),+3,+8,der(12)add(12)t(12;19)(q13;q13.1),<br>add(17)(q11.2),der(19)t(12;19)(q13;q13.1) | 1           |
| 49,XX,del(1),+8,der(12)add(12)t(12;19)(q13;q13.1),<br>+?19,der(19)t(12;19),+20                     | 1           |

**Supplementary Table S7.** Incidence of lung metastasis in Kitra-SRS-inoculated mice.

|                             | Metastasis + |
|-----------------------------|--------------|
| $1 \times 10^7$ cells (n=5) | 4/5 (80%)    |
| $1 \times 10^8$ cells (n=5) | 3/5 (60%)    |

**Supplementary Table S8.** Seventeen drugs that inhibited more than 80 % cell viability in Kitra-SRS cells among 1134 FDA-approved drugs.

| Drug name                | Cell viability (%) |
|--------------------------|--------------------|
|                          | Kitra              |
| Mitoxantrone HCl         | -3.2               |
| Penfluridol              | 0.1                |
| Alexidine HCl            | 0.5                |
| Auranofin                | 0.5                |
| Terfenadine              | 1.2                |
| Ponatinib (AP24534)      | 2                  |
| Carfilzomib (PR-171)     | 2.3                |
| Emetine                  | 2.3                |
| Idarubicin HCl           | 3.2                |
| Daunorubicin HCl         | 3.5                |
| Bortezomib (PS-341)      | 3.6                |
| 9-Aminoacridine          | 3.9                |
| Crystal Violet           | 4.2                |
| Doxorubicin (Adriamycin) | 6.6                |
| Epirubicin HCl           | 7                  |
| Topotecan HCl            | 7.8                |
| Camptothecin             | 8.3                |

## Supplementary Table S9. Antibodies.

| Target                                                    | Clone/<br>product name | Source            | Supplier                  | Concentration/<br>Dilution | Blocking buffer |
|-----------------------------------------------------------|------------------------|-------------------|---------------------------|----------------------------|-----------------|
| <b><i>Immunohistochemistry</i></b>                        |                        |                   |                           |                            |                 |
| CD99                                                      | O13                    | mouse monoclonal  | Nichirei Biosciences      | a diluted antibody         | -               |
| bcl-2                                                     | 124                    | mouse monoclonal  | Nichirei Biosciences      | a diluted antibody         | -               |
| WT1                                                       | #83535                 | rabbit monoclonal | Cell Signaling Technology | 1:100                      | -               |
| Ki-67                                                     | #9027                  | rabbit monoclonal | Cell Signaling Technology | 1:400                      | -               |
| normal rabbit IgG                                         | 148-09551              | -                 | Wako                      | 1:1000                     | -               |
| normal mouse IgG                                          | sc-2025                | -                 | Santa Cruz                | 1:1000                     | -               |
| <b><i>Immunoblotting</i></b>                              |                        |                   |                           |                            |                 |
| IGF-1R $\beta$                                            | #3027                  | rabbit monoclonal | Cell Signaling Technology | 1:1000                     | 5% milk in TBST |
| phospho-IGF-1R $\beta$ (Tyr980)                           | #4568                  | rabbit monoclonal | Cell Signaling Technology | 1:1000                     | 5% milk in TBST |
| phospho-IGF-1R $\beta$ (Tyr1135/1136)                     | #3024                  | rabbit monoclonal | Cell Signaling Technology | 1:1000                     | 5% milk in TBST |
| IR $\beta$                                                | #3025                  | rabbit monoclonal | Cell Signaling Technology | 1:1000                     | 5% milk in TBST |
| phospho-IR $\beta$ (Tyr1185)                              | ab62321                | rabbit monoclonal | Abcam                     | 1:2000                     | 5% milk in TBST |
| AKT                                                       | #4691                  | rabbit monoclonal | Cell Signaling Technology | 1:1000                     | 5% milk in TBST |
| phospho-AKT                                               | #4060                  | rabbit monoclonal | Cell Signaling Technology | 1:1000                     | 5% milk in TBST |
| cleaved PARP                                              | #9542                  | rabbit monoclonal | Cell Signaling Technology | 1:1000                     | 5% milk in TBST |
| $\beta$ -actin                                            | #4970                  | rabbit monoclonal | Cell Signaling Technology | 1:1000                     | 5% milk in TBST |
| horseradish peroxidase (HRP)-coupled goat anti-rabbit IgG | #7074                  | -                 | Cell Signaling Technology | 1:1000                     | -               |
| HRP-coupled horse anti-mouse IgG                          | #7076                  | -                 | Cell Signaling Technology | 1:1000                     | -               |
